# Supplementary material for: Tricarbonyltechnetium(i) and tricarbonylrhenium(i) complexes of amino acids: crystal and molecular structure of a novel cyclic dimeric Re(CO)3-amino acid complex comprised of the OON donor atom set of the tridentate ligand
Source: Royal Society of Chemistry journal article supplement (doi:10.1039/c3dt50928a), 2013-01-01
Supplement: c3dt50928a.pdf [file c3dt50928a.pdf]

## Supplementary Data and Figures.

**Supplementary Figure S1.**  $[\text{Re}(\text{CO})_3(\text{H}_2\text{O})_3]\text{OTf}$  ESI-MS spectrometer:  $m/z$  271 ( $[\text{Re}(\text{CO})_3]^+$ , 90%), 289 ( $[\text{Re}(\text{CO})_3(\text{H}_2\text{O})]^+$ , 30%), 312 ( $[\text{Re}(\text{CO})_3(\text{H}_2\text{O}) + \text{Na}]^+$ , 100%) and 330 ( $[\text{Re}(\text{CO})_3(\text{H}_2\text{O})_2 + \text{Na}]^+$ , 70%)

**Supplementary Figure S2.**  $\text{Re}(\text{CO})_3\text{D,L-DAPA}$  IR (KBr,  $\text{v}/\text{cm}^{-1}$ ) spectrometer: 2026 (s) and 1895 (s)

**Supplementary Figure S3.**  $^1\text{H}$  NMR spectrum of  $\text{Re}(\text{CO})_3\text{D,L-DAPA}$ .  $^1\text{H}$  NMR [ $\delta$  (ppm),  $\text{CD}_3\text{OD-D}_2\text{O}$ ]: 2.76 - 2.75 (m, 1H-methylene), 3.05 - 2.98 (m, 1H-methylene), 3.91 (s, 1H-methine)

**Supplementary Figure S4.**  $^{13}\text{C}$  NMR spectrum of  $\text{Re}(\text{CO})_3\text{D,L-DAPA}$ .  $^{13}\text{C}$  NMR ( $\text{CD}_3\text{OD}$ ):  $\delta$  197.9, 196.9 [*fac*- $\text{Re}(\text{CO})_3$ ], 181.4 (C,  $\text{COO}^-$ ), 59.9 (CH), 41.7 ( $\text{CH}_2$ )

**Supplementary Figure S5.**  $^{13}\text{C}$  NMR spectrum of  $\text{Re}(\text{CO})_3\text{D,L-DAPA}$ . DEPT-135

**Supplementary Figure S6.**  $^{13}\text{C}$  NMR spectrum of  $\text{Re}(\text{CO})_3\text{D,L-DAPA}$ . DEPT-90

**Supplementary Figure S7.**  $\text{Re}(\text{CO})_3\text{D,L-DAPA}$  ESI-MS spectrometer:  $m/z$  396.90 (100%,  $\text{M} + \text{Na}^+$ )

**Supplementary Figure S8.**  $\text{Re}(\text{CO})_3\text{L-Asp}$  IR (KBr,  $\text{v}/\text{cm}^{-1}$ ) spectrometer: 2027 (s) and 1899 (s)

**Supplementary Figure S9.**  $^1\text{H}$  NMR spectrum of  $\text{Re}(\text{CO})_3\text{L-Asp}$ .  $^1\text{H}$  NMR [ $\delta$  (ppm),  $\text{CD}_3\text{OD} - \text{D}_2\text{O}$ ]: 2.87-2.82 (m, 2H-methylene), 3.94 (s, 1H-methine)

**Supplementary Figure S10.**  $^{13}\text{C}$  NMR spectrum of  $\text{Re}(\text{CO})_3\text{L-Asp}$ .  $^{13}\text{C}$  NMR ( $\text{CD}_3\text{OD}$ ):  $\delta$  199.4, 198.5, 198.0 [*fac*- $\text{Re}(\text{CO})_3$ ], 186.2 (C,  $\alpha\text{-COO}$ ), 176.9 (C,  $\beta\text{-COO}^-$ ), 54.2 (CH), 40.9 ( $\text{CH}_2$ ).

**Supplementary Figure S11.**  $^{13}\text{C}$  NMR spectrum of  $\text{Re}(\text{CO})_3\text{L-Asp}$ . DEPT-135

**Supplementary Figure S12.**  $^{13}\text{C}$  NMR spectrum of  $\text{Re}(\text{CO})_3\text{L-Asp}$ . DEPT-90

**Supplementary Figure S13.**  $\text{Re}(\text{CO})_3\text{L-Asp}$  ESI-MS spectrometer:  $m/z$  400.43 (100%,  $\text{M-H}^-$ )

**Supplementary Figure S14.**  $\text{Re}(\text{CO})_3\text{D,L-Asp}$  IR (KBr,  $\text{v}/\text{cm}^{-1}$ ) spectrometer: 2025 (s), 1905 (s), 1874 (s)

**Supplementary Figure S15.**  $^1\text{H}$  NMR spectrum of  $\text{Re}(\text{CO})_3\text{D,L-Asp}$ .  $^1\text{H}$  NMR [ $\delta$  (ppm),  $\text{D}_2\text{O}$ ]: 2.74 (s, 1H- methylene), 2.80 (d, 1H-methylene), 3.99-3.94 (b, 1H-methine).

**Supplementary Figure S16.**  $^{13}\text{C}$  NMR spectrum of  $\text{Re}(\text{CO})_3\text{D,L-Asp}$ .  $^{13}\text{C}$  NMR ( $\text{D}_2\text{O}$ ):  $\delta$  198.0, 197.1, 196.3 [*fac*- $\text{Re}(\text{CO})_3$ ], 185.8 (C,  $\alpha\text{-COO}^-$ ), 176.7 (C,  $\beta\text{-COO}^-$ ), 52.4 (CH), 39.4 ( $\text{CH}_2$ ).

**Supplementary Figure S17.**  $^{13}\text{C}$  NMR spectrum of  $\text{Re}(\text{CO})_3\text{D,L-Asp}$ . DEPT-135

**Supplementary Figure S18.**  $^{13}\text{C}$  NMR spectrum of  $\text{Re}(\text{CO})_3\text{D,L-Asp}$ . DEPT-90

**Supplementary Figure S19.**  $\text{Re}(\text{CO})_3\text{D,L-Asp}$  ESI-MS spectrometer: MS (ESI, -ve mode):  $m/z$  400.32 (100%,  $\text{M-H}^-$ ).

**Supplementary Figure S20.**  $[\text{Et}_3\text{NH}][\text{Re}(\text{CO})_3\text{-}(\text{D,L-Asp})]$  dimeric complex IR (KBr,  $\text{v}/\text{cm}^{-1}$ ) spectrometer: IR (KBr,  $\text{v}/\text{cm}^{-1}$ ): 2011 (s), 1883 (s), 1856 (s).

**Supplementary Figure S21.**  $^1\text{H}$  NMR spectrum of  $[\text{Et}_3\text{NH}][\text{Re}(\text{CO})_3\text{-}(\text{D,L-Asp})]$  dimeric complex.  $^1\text{H}$  NMR [ $\delta$  (ppm),  $\text{CD}_3\text{OD}$ ]:  $\delta$  1.33 (t, 18H,  $\text{CH}_3\text{-Triethylamine}$ ), 2.46-2.53, 2.75-2.94 (m, 4H, 2 $\text{CH}_2$ ), 3.22 (q, 12H,  $\text{CH}_2\text{-Triethylamine}$ ), 3.35-3.41 (m, H, CH), 3.89-3.93 (m, H, CH).

**Supplementary Figure S22.**  $^{13}\text{C}$  NMR spectrum of  $[\text{Et}_3\text{NH}][\text{Re}(\text{CO})_3\text{-}(\text{D,L-Asp})]$  dimeric complex.  $^{13}\text{C}$  NMR [ $\delta$  (ppm),  $\text{CD}_3\text{OD}$ ]:  $\delta$  199.4, 199.2, 199.1, 198.5, 198.4 [2(*fac*- $\text{Re}(\text{CO})_3$ )], 186.2 ( $-\text{COO}^-$ ), 183.9 ( $-\text{COO}^-$ ), 177.7 ( $-\text{COO}^-$ ), 177.0 ( $-\text{COO}^-$ ), 57.2 (CH), 54.1 (CH), 48.0 ( $\text{CH}_2\text{-triethylamine}$ ), 40.8 ( $\text{CH}_2$ ), 40.3 ( $\text{CH}_2$ ), 9.5 ( $\text{CH}_3\text{-triethylamine}$ ).

**Supplementary Figure S23.**  $^{13}\text{C}$  NMR spectrum of  $[\text{Et}_3\text{NH}][\text{Re}(\text{CO})_3\text{-}(\text{D,L-Asp})]$  dimeric complex. DEPT-135

**Supplementary Figure S24.**  $^{13}\text{C}$  NMR spectrum of  $[\text{Et}_3\text{NH}][\text{Re}(\text{CO})_3\text{-}(\text{D,L-Asp})]$  dimeric complex. DEPT-90

**Supplementary Figure S25.**  $[\text{Et}_3\text{NH}][\text{Re}(\text{CO})_3\text{-}(\text{D,L-Asp})]$  dimeric complex. FAB(+) spectrometer: (mNBA) MS:  $m/z$  1007.04 [ $2\text{M}+2\text{Et}_3\text{NH}+\text{H}$ ] $^+$  dimeric complex, 504.53 [ $\text{M}+\text{Et}_3\text{NH}+\text{H}$ ] $^+$  monomeric complex.

**Supplementary Figure S26.**  $\text{Re}(\text{CO})_3\text{CysH}$ . IR (KBr,  $\text{v}/\text{cm}^{-1}$ ) spectrometer: 2001 (s), 1896 (s).

**Supplementary Figure S27.**  $^1\text{H}$  NMR spectrum of  $\text{Re}(\text{CO})_3\text{CysH}$ .  $^1\text{H}$  NMR [ $\delta$  (ppm),  $\text{D}_2\text{O}$ ]: 3.37-3.34 (m, 2H-methylene), 3.95-3.94 (m, 1H-methine).

**Supplementary Figure S28.**  $^{13}\text{C}$  NMR spectrum of  $\text{Re}(\text{CO})_3\text{CysH}$ .  $^{13}\text{C}$  NMR ( $\text{D}_2\text{O}$ ):  $\delta$  195.4 [*fac*- $\text{Re}(\text{CO})_3$ ], 171.2 (C,  $\alpha\text{-COO}^-$ ), 58.0 (CH), 37.1 ( $\text{CH}_2$ ).

**Supplementary Figure S29.**  $^{13}\text{C}$  NMR spectrum of  $\text{Re}(\text{CO})_3\text{CysH}$ . DEPT-135

**Supplementary Figure S30.**  $^{13}\text{C}$  NMR spectrum of  $\text{Re}(\text{CO})_3\text{CysH}$ . DEPT-90

**Supplementary Figure S31.**  $\text{Re}(\text{CO})_3\text{CysH}$  ESI-MS spectrometer:  $m/z$  391.91 [100%,  $(\text{M}+\text{H})^+$ ].

**Supplementary Data S32.** Bond lengths in [Å] of  $\text{Re}(\text{CO})_3\text{-D,L-DAPA}$  and  $\text{Re}(\text{CO})_3\text{-D,L-Asp.Et}_3\text{NH}$  crystal data in table.

**Supplementary Data S33.** Bond angle in Degree of  $\text{Re}(\text{CO})_3\text{-D,L-DAPA}$  and  $\text{Re}(\text{CO})_3\text{-D,L-Asp.Et}_3\text{NH}$  crystal data in table.

**Supplementary Figure S34.** Electrophoresis Fig. of tricarbonyltechnetium (I) complexes of amino acids. Electrophoresis done in 0.01M bicarbonate buffer pH 7 for 60 min at potential difference of 3kV and applied current of 10 mA for 1 h.

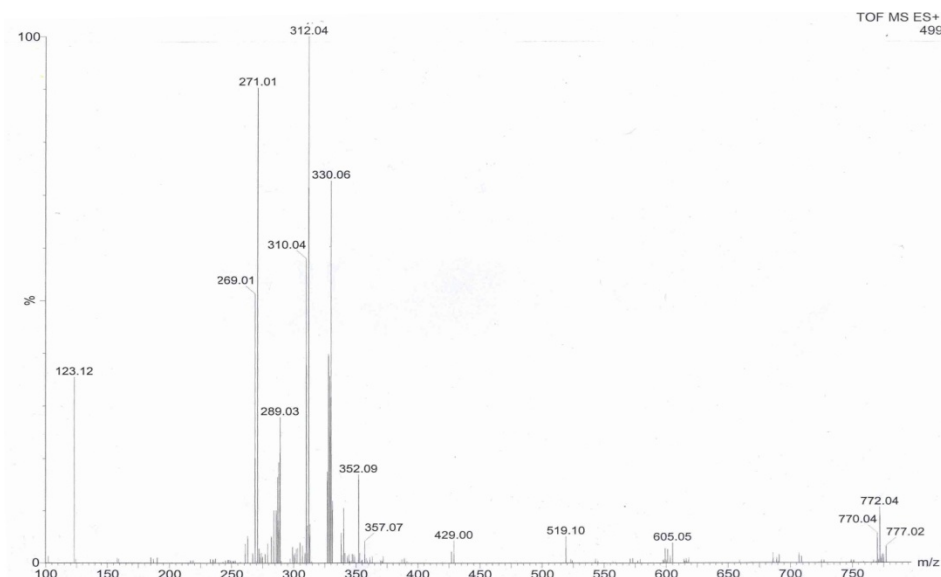

**Supplementary Figure S1.**

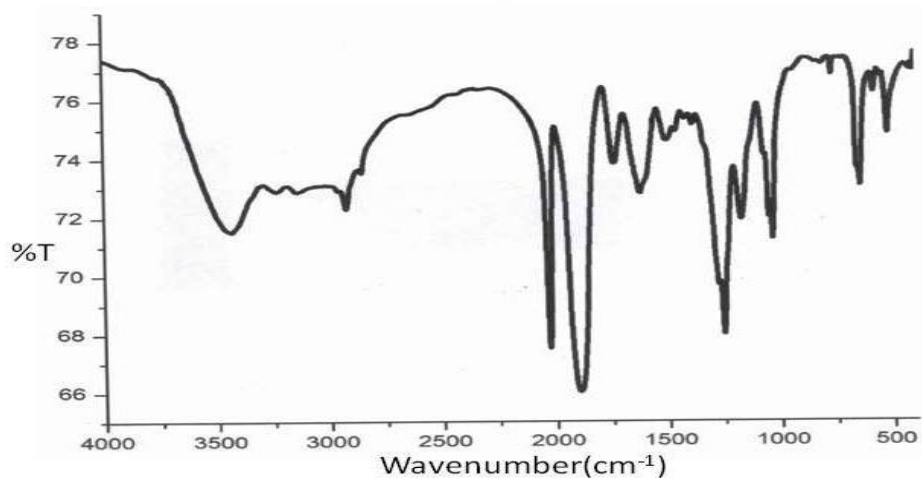

Supplementary Figure S2.

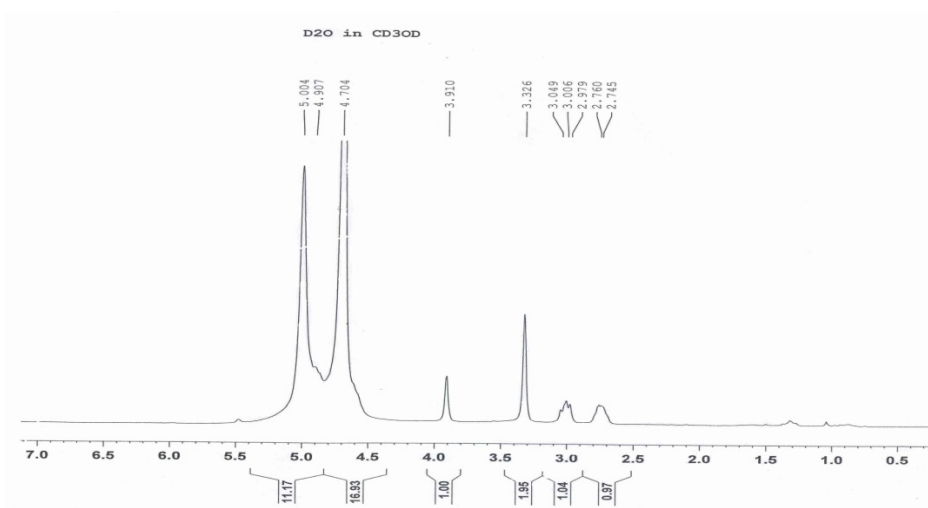

Supplementary Figure S3.

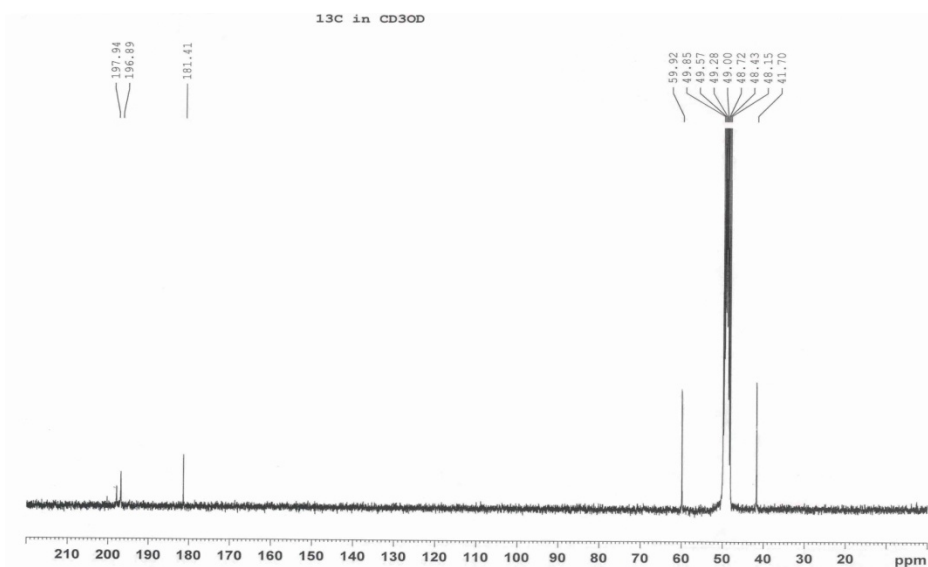

Supplementary Figure S4.

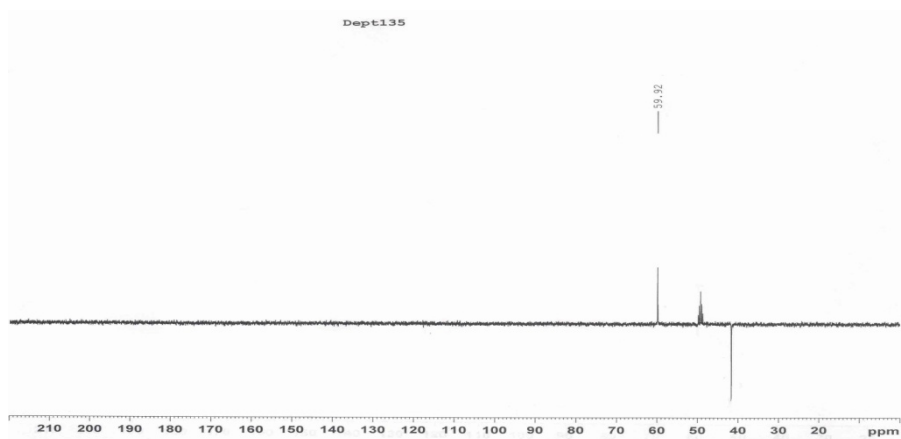

**Supplementary Figure S5.**

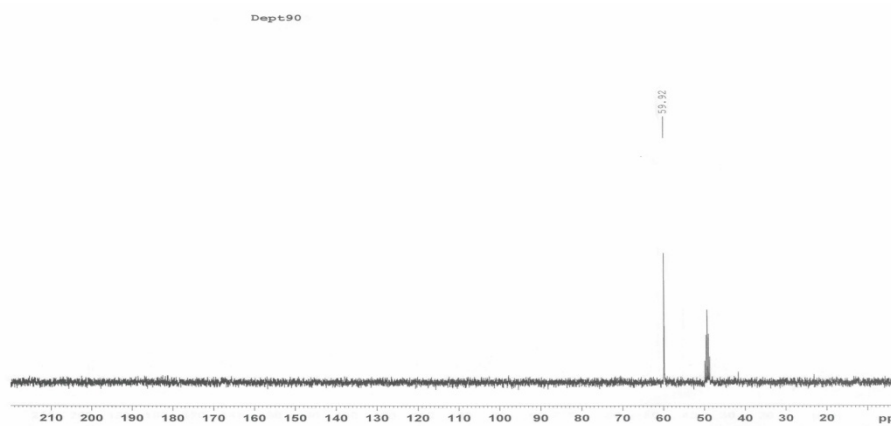

**Supplementary Figure S6.**

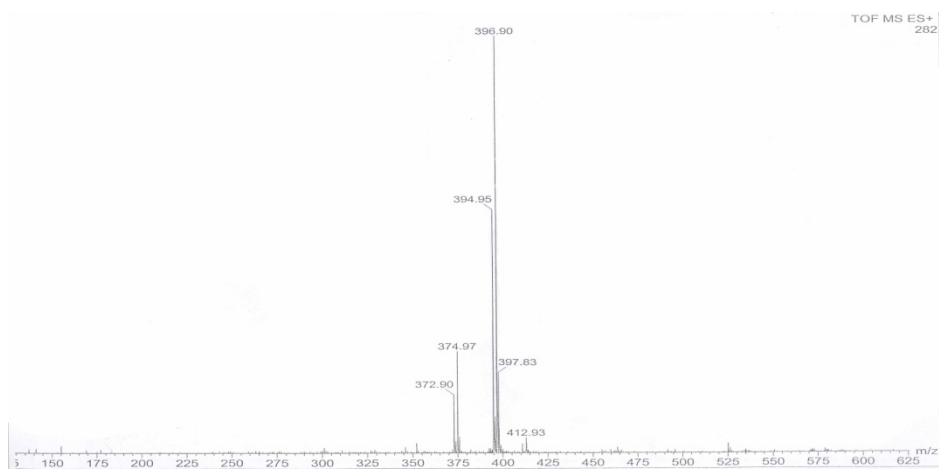

**Supplementary Figure S7.**

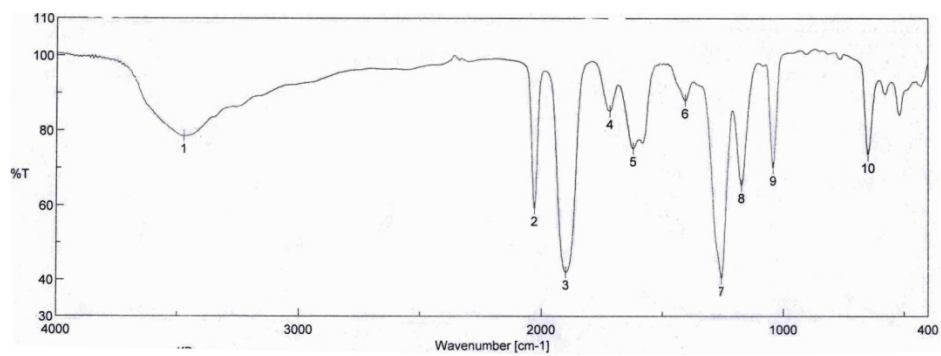

Supplementary Figure S8.

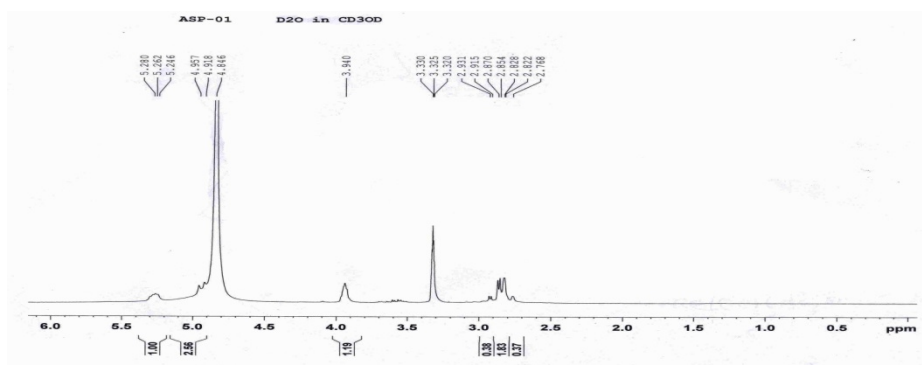

Supplementary Figure S9.

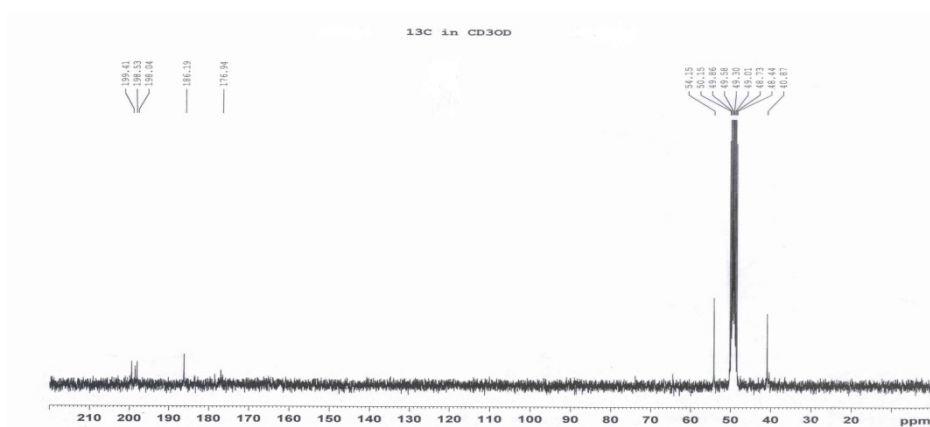

Supplementary Figure S10.

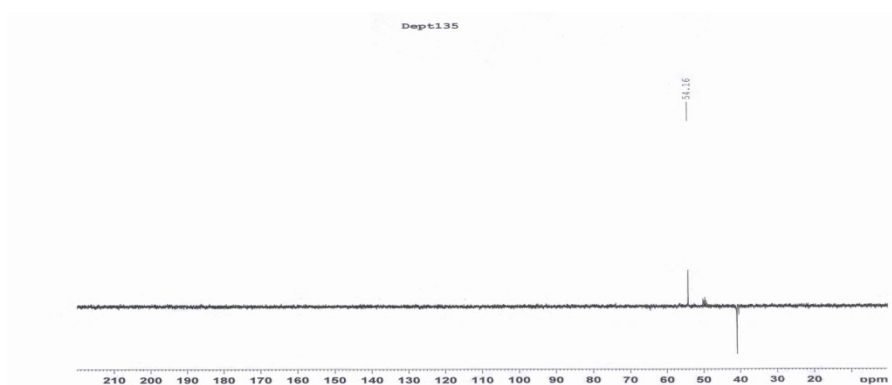

### Supplementary Figure S11.

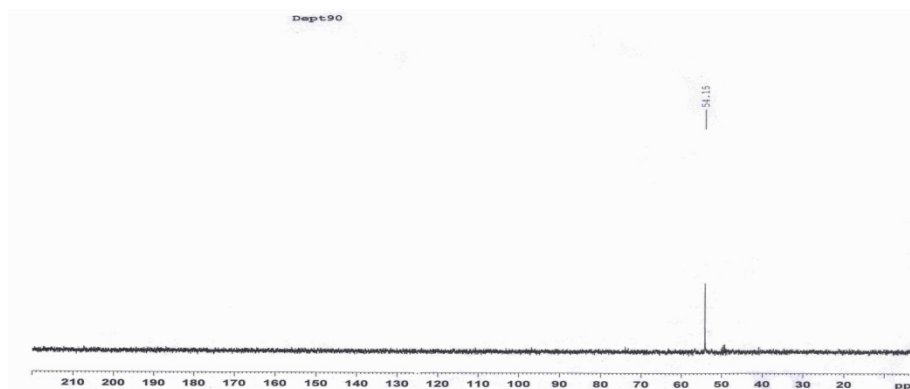

### Supplementary Figure S12.

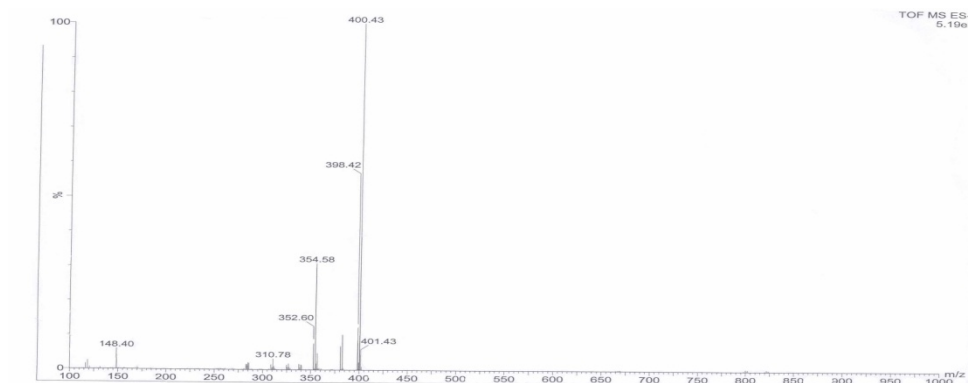

### Supplementary Figure S13.

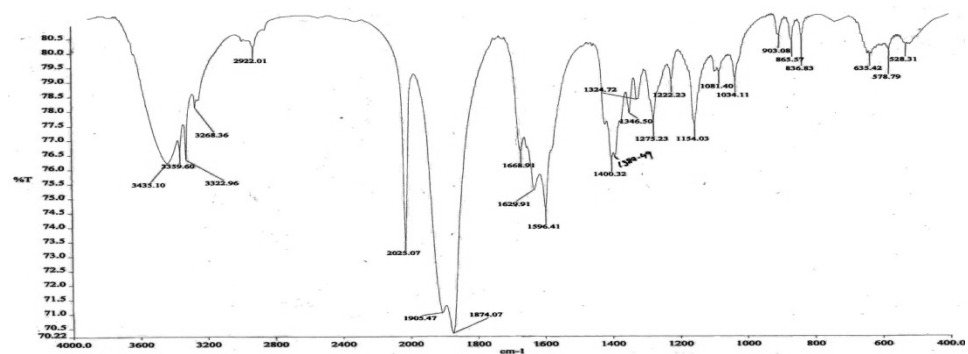

### Supplementary Figure S14.

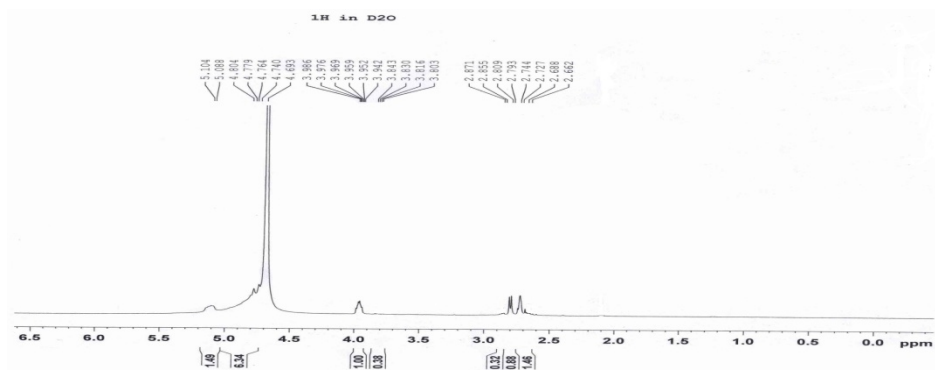

Supplementary Figure S15.

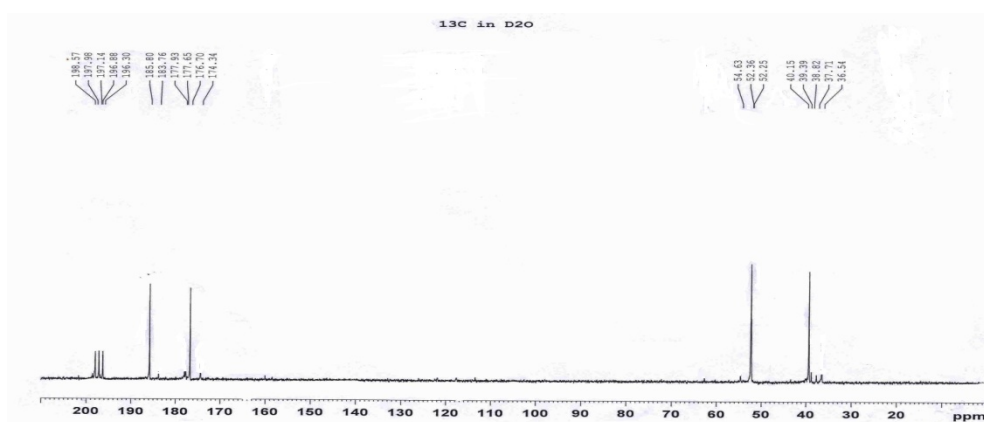

Supplementary Figure S16.

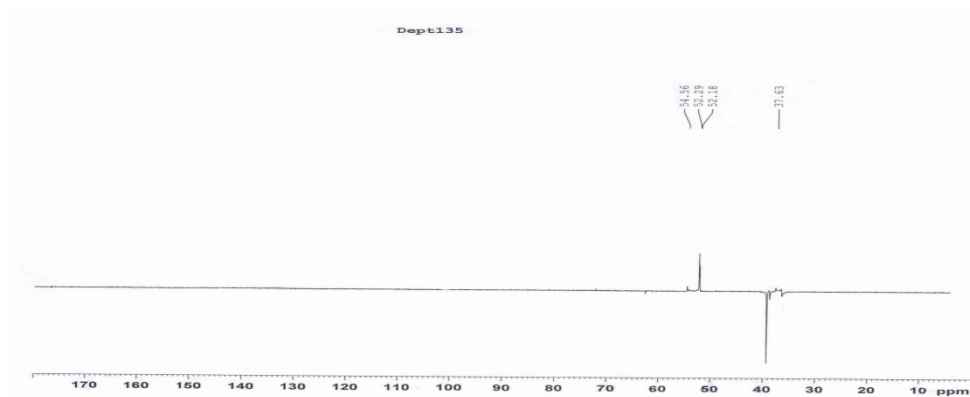

Supplementary Figure S17.



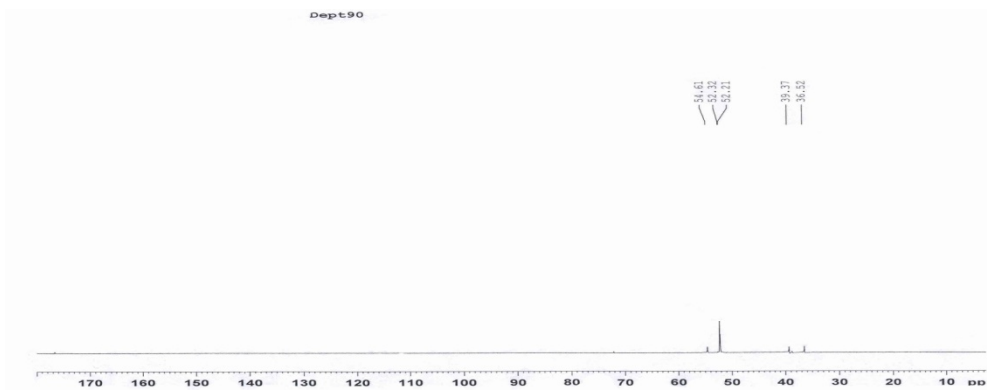

Supplementary Figure S18.

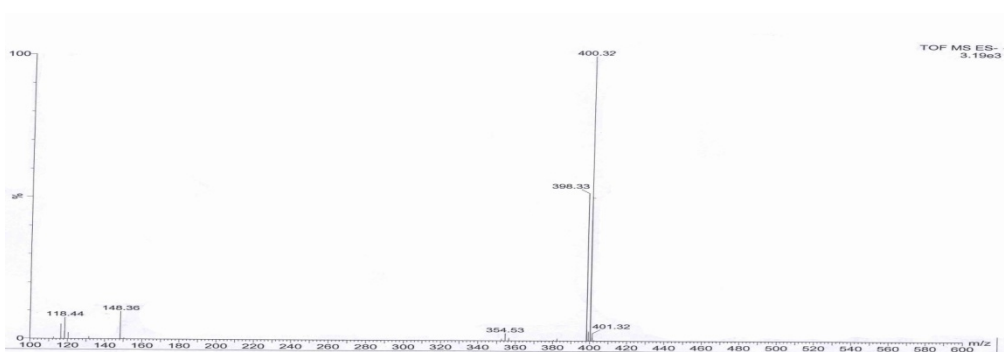

Supplementary Figure S19.

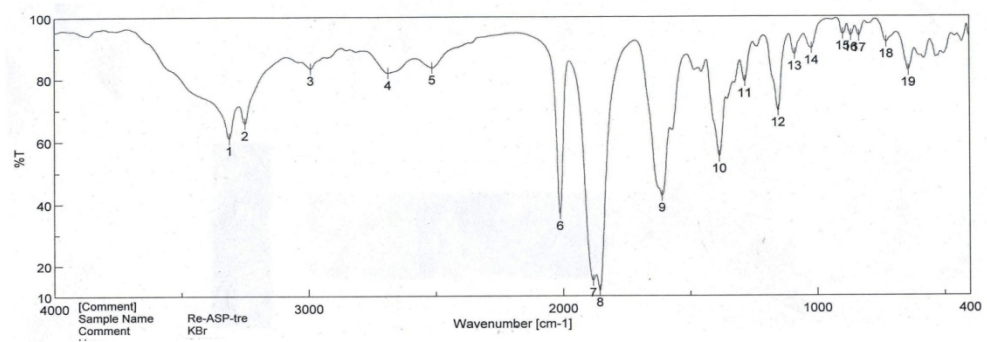

Supplementary Figure S20.



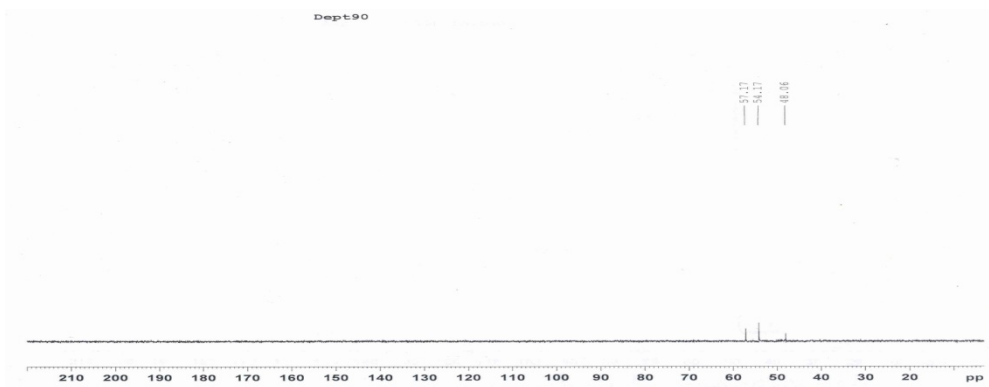

**Supplementary Figure S24.**

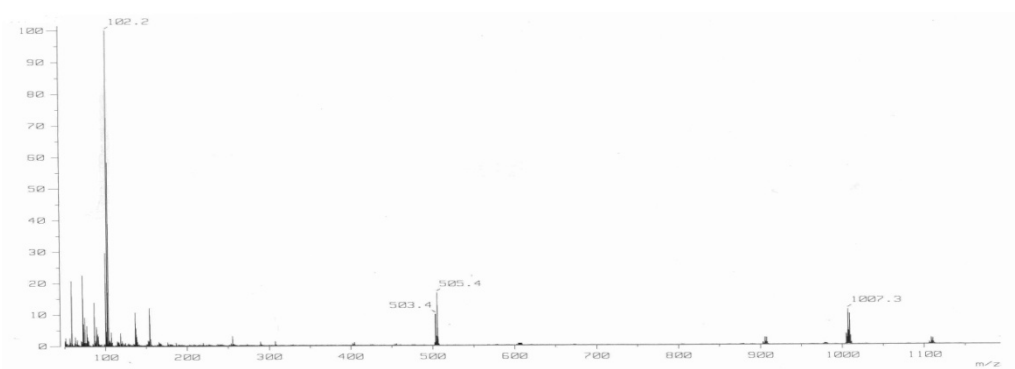

**Supplementary Figure S25.**

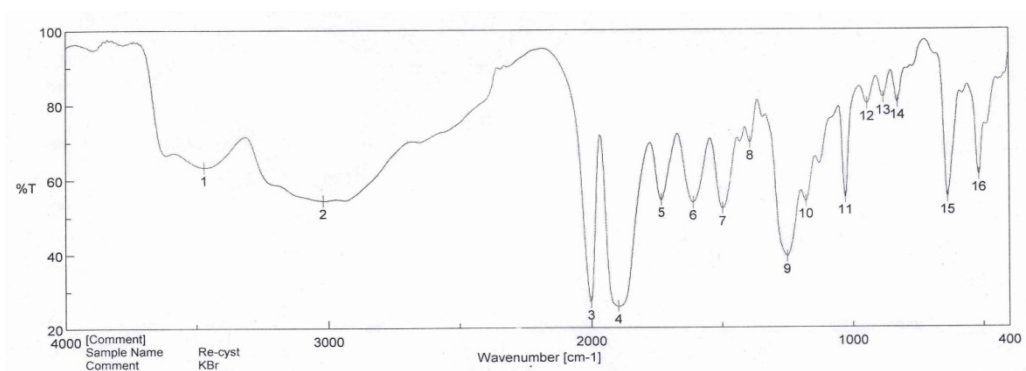

**Supplementary Figure S26.**

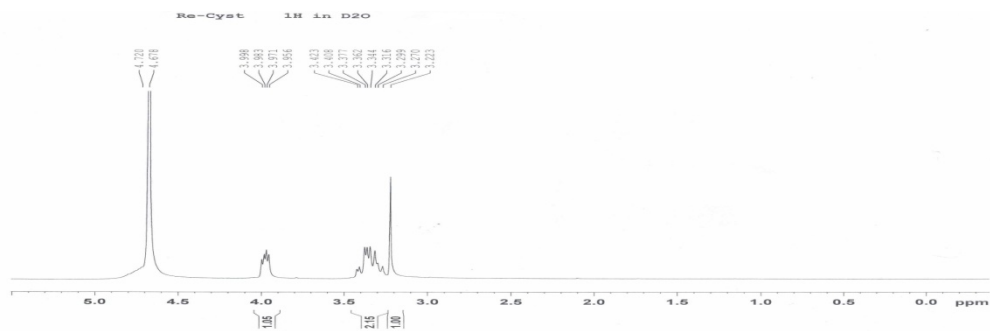

Supplementary Figure S27.

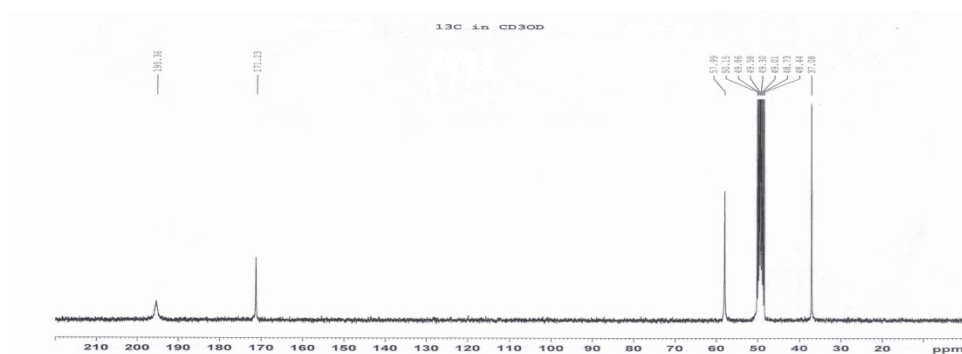

Supplementary Figure S28.

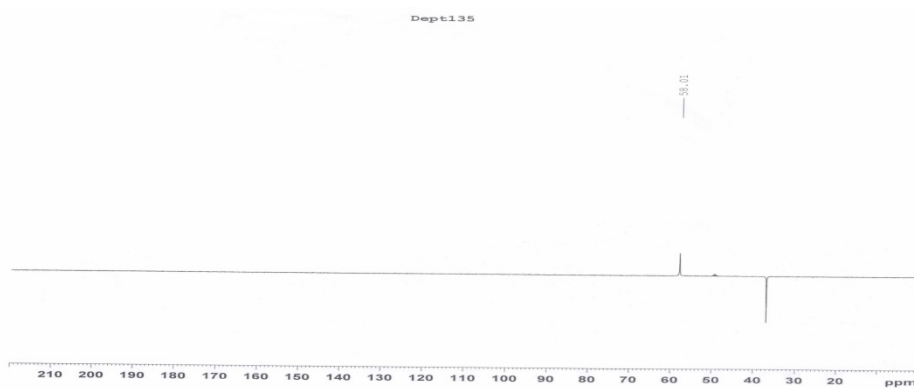

Supplementary Figure S29.

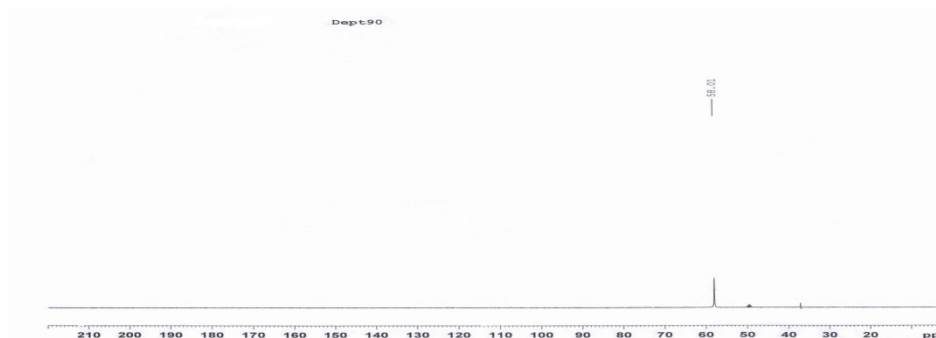

**Supplementary Figure S30.**

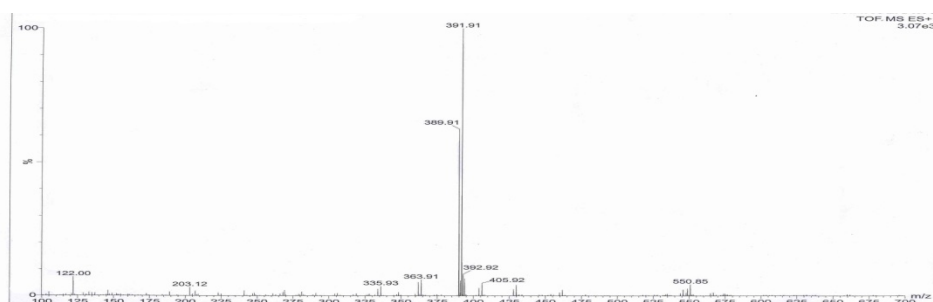

**Supplementary Figure S31.**

Bond lengths in [ $\text{\AA}$ ] of  $\text{Re}(\text{CO})_3\text{-D,L-DAPA}$  and  $\text{Re}(\text{CO})_3\text{-D,L-Asp.Et}_3\text{NH}$  crystal data.

| $\text{Re}(\text{CO})_3\text{-D,L-DAPA}$ | Bond lengths [ $\text{\AA}$ ] | $\text{Re}(\text{CO})_3\text{-D,L-Asp.Et}_3\text{NH}$ | Bond lengths [ $\text{\AA}$ ] |
|------------------------------------------|-------------------------------|-------------------------------------------------------|-------------------------------|
| Re(1)-C(1)                               | 1.899(10)                     | Re(1)-C(2)                                            | 1.892(7)                      |
| Re(1)-C(3)                               | 1.924(10)                     | Re(1)-C(1)                                            | 1.894(8)                      |
| Re(1)-C(2)                               | 1.946(11)                     | Re(1)-C(3)                                            | 1.922(7)                      |
| Re(1)-O(4)                               | 2.182(7)                      | Re(1)-O(6)                                            | 2.145(4)                      |
| Re(1)-N(1)                               | 2.208(9)                      | Re(1)-O(4)                                            | 2.150(4)                      |
| Re(1)-N(2)                               | 2.223(8)                      | Re(1)-N(1)                                            | 2.200(5)                      |
| N(2)-C(6)                                | 1.467(14)                     | C(1)-O(1)                                             | 1.160(8)                      |
| C(4)-O(3)                                | 1.242(14)                     | C(2)-O(2)                                             | 1.152(8)                      |
| C(4)-O(4)                                | 1.267(13)                     | C(3)-O(5)                                             | 1.149(8)                      |
| C(4)-C(5)                                | 1.522(16)                     | C(4)-O(3)                                             | 1.219(7)                      |
| N(1)-C(5)                                | 1.492(14)                     | C(4)-O(4)                                             | 1.284(7)                      |
| C(1)-O(1)                                | 1.152(13)                     | C(4)-C(5)                                             | 1.529(8)                      |
| C(5)-C(6)                                | 1.505(16)                     | C(5)-N(1)                                             | 1.493(7)                      |
| C(3)-O(5)                                | 1.139(13)                     | C(5)-C(7)                                             | 1.525(8)                      |

|           |           |             |           |
|-----------|-----------|-------------|-----------|
| C(2)-O(2) | 1.102(14) | C(6)-O(7)   | 1.241(7)  |
|           |           | C(6)-O(6)   | 1.289(7)  |
|           |           | C(6)-C(7)#1 | 1.511(8)  |
|           |           | C(7)-C(6)#1 | 1.511(8)  |
|           |           | N(2)-C(12)  | 1.443(12) |
|           |           | N(2)-C(8)   | 1.462(14) |
|           |           | N(2)-C(10)  | 1.531(12) |
|           |           | C(8)-C(9)   | 1.404(15) |
|           |           | C(11)-C(10) | 1.442(15) |
|           |           | C(12)-C(13) | 1.487(15) |

**Supplementary Data S32.**

Bond angle in Degree of **Re(CO)<sub>3</sub>-D,L-DAPA** and **Re(CO)<sub>3</sub>-D,L-Asp.Et<sub>3</sub>NH** crystal data.

| <b>Re(CO)<sub>3</sub>-D,L-DAPA</b> | Angle    | <b>Re(CO)<sub>3</sub>-D,L-Asp.Et<sub>3</sub>NH</b> | Angle     |
|------------------------------------|----------|----------------------------------------------------|-----------|
| C(1)-Re(1)-C(3)                    | 88.7(5)  | C(2)-Re(1)-C(1)                                    | 88.6(3)   |
| C(1)-Re(1)-C(2)                    | 88.1(5)  | C(2)-Re(1)-C(3)                                    | 88.4(3)   |
| C(3)-Re(1)-C(2)                    | 89.7(5)  | C(1)-Re(1)-C(3)                                    | 88.3(3)   |
| C(1)-Re(1)-O(4)                    | 171.2(4) | C(2)-Re(1)-O(6)                                    | 172.9(3)  |
| C(3)-Re(1)-O(4)                    | 98.6(4)  | C(1)-Re(1)-O(6)                                    | 95.1(2)   |
| C(2)-Re(1)-O(4)                    | 96.7(4)  | C(3)-Re(1)-O(6)                                    | 97.8(2)   |
| C(1)-Re(1)-N(1)                    | 98.0(4)  | C(2)-Re(1)-O(4)                                    | 96.5(3)   |
| C(3)-Re(1)-N(1)                    | 171.2(4) | C(1)-Re(1)-O(4)                                    | 172.3(2)  |
| C(2)-Re(1)-N(1)                    | 96.2(4)  | C(3)-Re(1)-O(4)                                    | 97.6(2)   |
| O(4)-Re(1)-N(1)                    | 74.2(3)  | O(6)-Re(1)-O(4)                                    | 79.24(17) |
| C(1)-Re(1)-N(2)                    | 97.7(4)  | C(2)-Re(1)-N(1)                                    | 93.3(3)   |
| C(3)-Re(1)-N(2)                    | 96.5(4)  | C(1)-Re(1)-N(1)                                    | 99.1(2)   |
| C(2)-Re(1)-N(2)                    | 171.6(4) | C(3)-Re(1)-N(1)                                    | 172.4(2)  |
| O(4)-Re(1)-N(2)                    | 76.8(3)  | O(6)-Re(1)-N(1)                                    | 80.15(17) |

|                 |           |                  |           |
|-----------------|-----------|------------------|-----------|
| N(1)-Re(1)-N(2) | 77.1(3)   | O(4)-Re(1)-N(1)  | 74.88(17) |
| C(6)-N(2)-Re(1) | 111.0(6)  | O(1)-C(1)-Re(1)  | 178.4(7)  |
| O(3)-C(4)-O(4)  | 123.2(10) | O(2)-C(2)-Re(1)  | 179.2(8)  |
| O(3)-C(4)-C(5)  | 120.2(10) | O(5)-C(3)-Re(1)  | 177.5(6)  |
| O(4)-C(4)-C(5)  | 116.6(9)  | O(3)-C(4)-O(4)   | 123.8(6)  |
| C(4)-O(4)-Re(1) | 113.9(6)  | O(3)-C(4)-C(5)   | 120.7(6)  |
| C(5)-N(1)-Re(1) | 101.6(6)  | O(4)-C(4)-C(5)   | 115.5(5)  |
| O(1)-C(1)-Re(1) | 178.2(9)  | C(4)-O(4)-Re(1)  | 118.5(4)  |
| N(1)-C(5)-C(6)  | 106.9(9)  | N(1)-C(5)-C(7)   | 115.0(5)  |
| N(1)-C(5)-C(4)  | 105.5(9)  | N(1)-C(5)-C(4)   | 108.0(4)  |
| C(6)-C(5)-C(4)  | 109.0(9)  | C(7)-C(5)-C(4)   | 113.5(5)  |
| N(2)-C(6)-C(5)  | 109.2(9)  | O(7)-C(6)-O(6)   | 125.1(6)  |
| O(5)-C(3)-Re(1) | 179.2(11) | O(7)-C(6)-C(7)#1 | 118.7(5)  |
| O(2)-C(2)-Re(1) | 178.8(12) | O(6)-C(6)-C(7)#1 | 116.2(5)  |
|                 |           | C(6)-O(6)-Re(1)  | 126.3(4)  |
|                 |           | C(5)-N(1)-Re(1)  | 107.8(3)  |
|                 |           | C(6)#1-C(7)-C(5) | 115.8(5)  |
|                 |           | C(12)-N(2)-C(8)  | 109.4(10) |
|                 |           | C(12)-N(2)-C(10) | 113.5(9)  |
|                 |           | C(8)-N(2)-C(10)  | 105.7(9)  |
|                 |           | C(9)-C(8)-N(2)   | 119.3(12) |
|                 |           | C(11)-C(10)-N(2) | 113.4(9)  |
|                 |           | N(2)-C(12)-C(13) | 115.4(10) |

**Supplementary Data S33.**

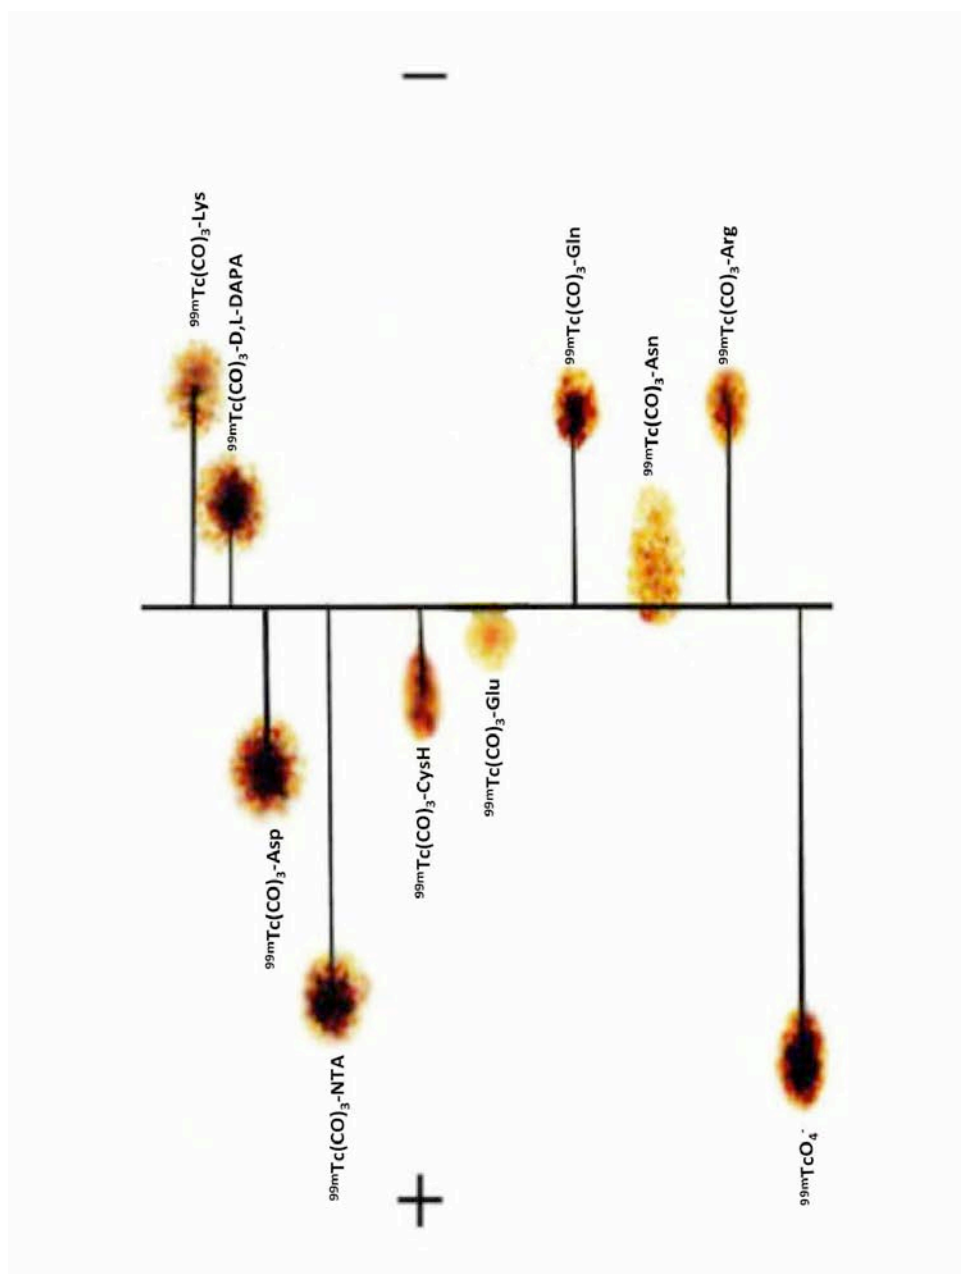

Supplementary Figure S34.
